# Supplementary material for: Chemical replacement route to Cu2−xSe-coated CuO nanotube array anode for enhanced performance in lithium ion batteries
Source: Royal Society of Chemistry journal article supplement (doi:10.1039/c3ta14722c), 2014-01-01

## Supplementary materials

### **Chemical replacement route to $\text{Cu}_{2-x}\text{Se}$ -coated CuO nanotube array anode for enhanced performance in lithium ion battery**

Weixin Zhang\*, Zaoyuan Zhou, Wenran Zhao, Zeheng Yang and Xiaoning Yang

School of Chemical Engineering, Hefei University of Technology and Anhui Key Laboratory  
of Controllable Chemical Reaction & Material Chemical Engineering, Hefei, Anhui 230009,

PR China

\*Corresponding author (Weixin Zhang).

Tel: +86 551 62901450.

Fax: +86 551 62901450.

E-mail: [wxzhang@hfut.edu.cn](mailto:wxzhang@hfut.edu.cn).

### **Figure Captions (Supplementary materials)**

Fig. S1 XRD pattern of  $\text{Cu}_{2-x}\text{Se}$  nanotube arrays on copper substrate.

Fig. S2 X-ray photoelectron spectra (XPS) of the  $\text{Cu}_{2-x}\text{Se}$ -coated CuO nanotube array sample:

(a) survey spectra, (b) C1s and (c) Cu LMM.

Fig. S3 TEM image and line-scanning elemental mapping showing the Cu, Se and O  
elemental profiles across the  $\text{Cu}_{2-x}\text{Se}$ -coated CuO nanotube.

Fig. S4 FESEM images of the bare  $\text{Cu}_{2-x}\text{Se}$  nanotube arrays: (a) low-magnification and (b)  
high-magnification.

Fig. S5 (a) Charge-discharge profiles and (b) Cycling performance of bare  $\text{Cu}_{2-x}\text{Se}$  nanotube  
arrays at 0.05-3.0 V at a current density of  $0.08 \text{ mA} \cdot \text{cm}^{-2}$ .

Fig. S6 The coulombic efficiency of the  $\text{Cu}_{2-x}\text{Se}$ -coated CuO electrode for 2-100 cycles.

**Fig. S1**

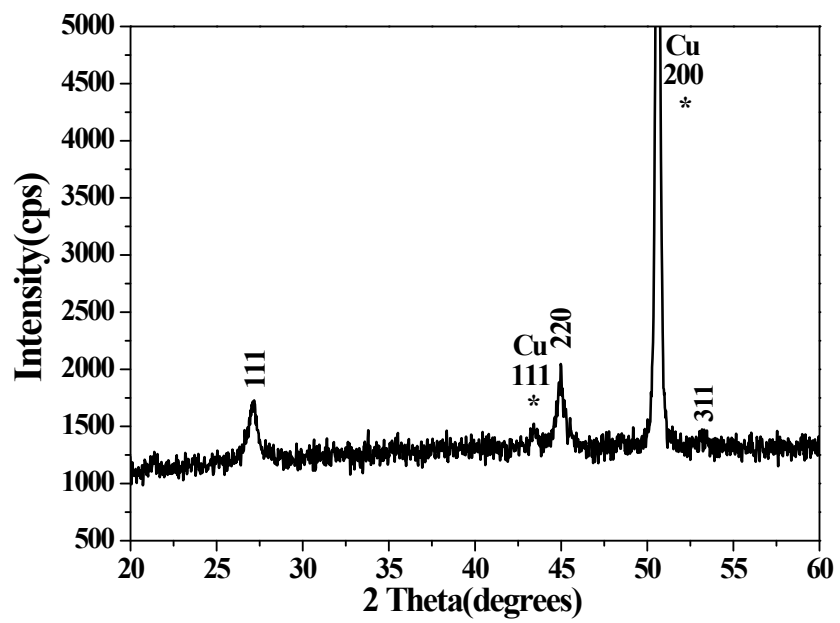

Fig. S2

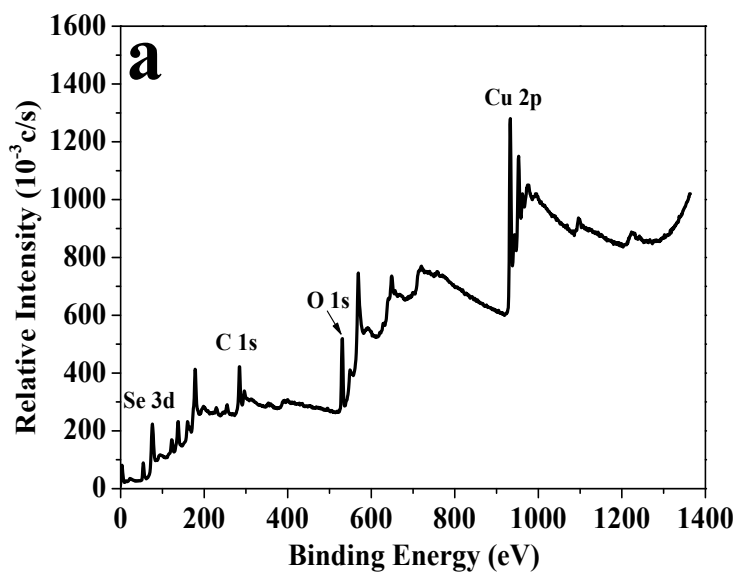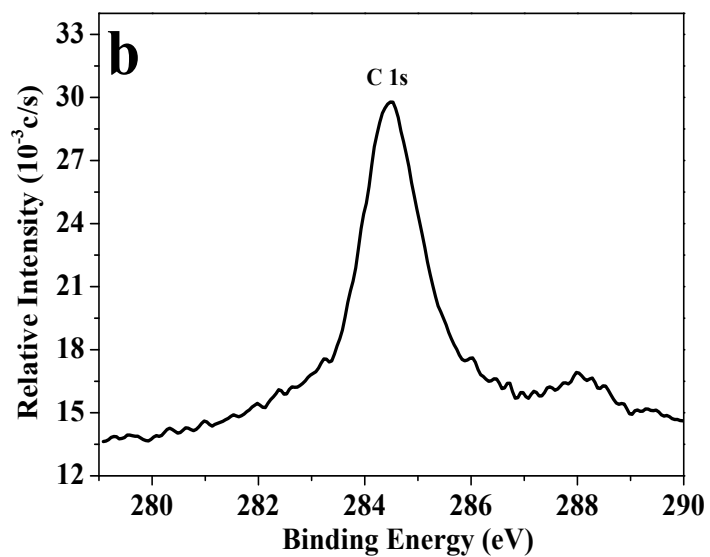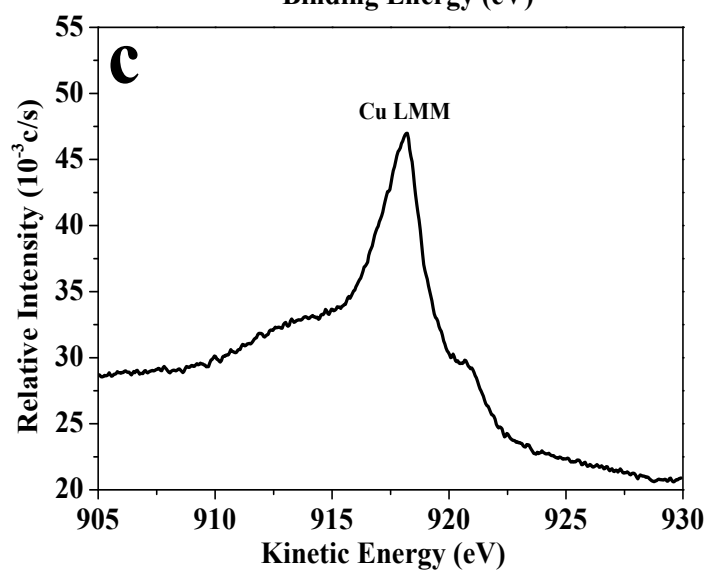

**Fig. S3**

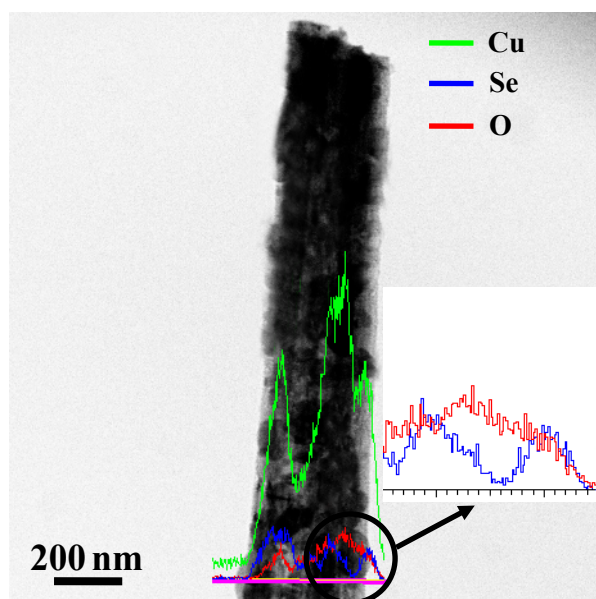

**Fig. S4**

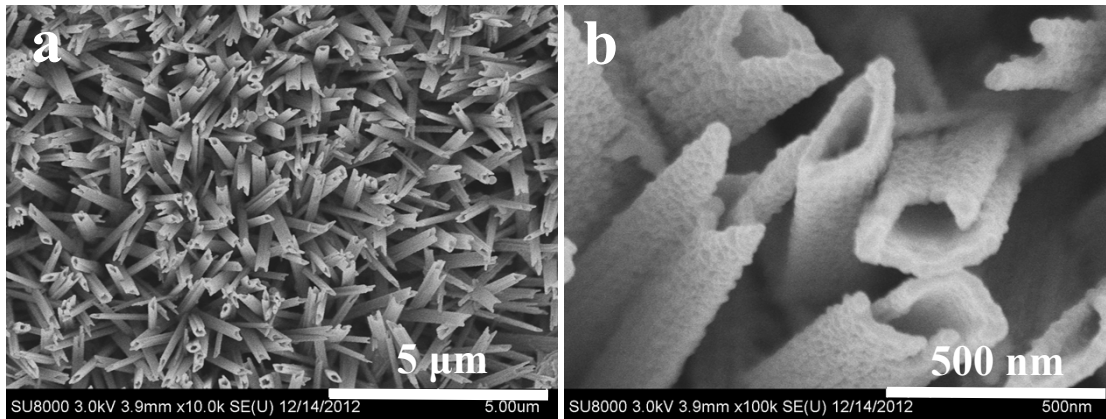

Fig. S5

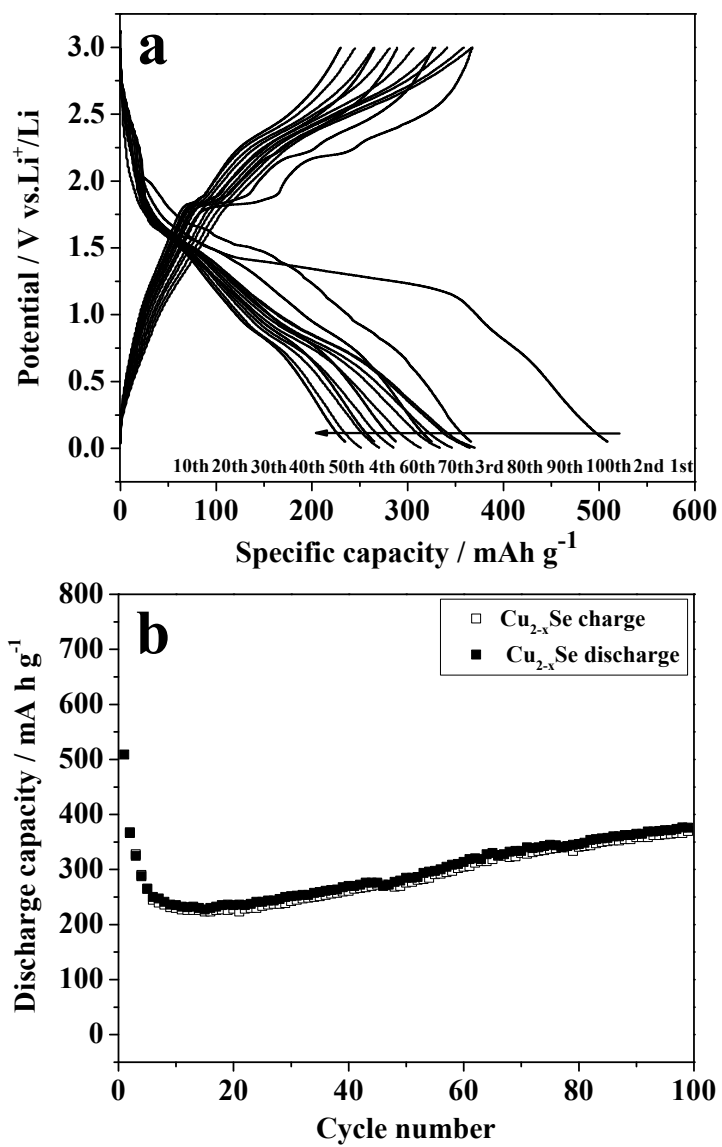

**Fig. S6**

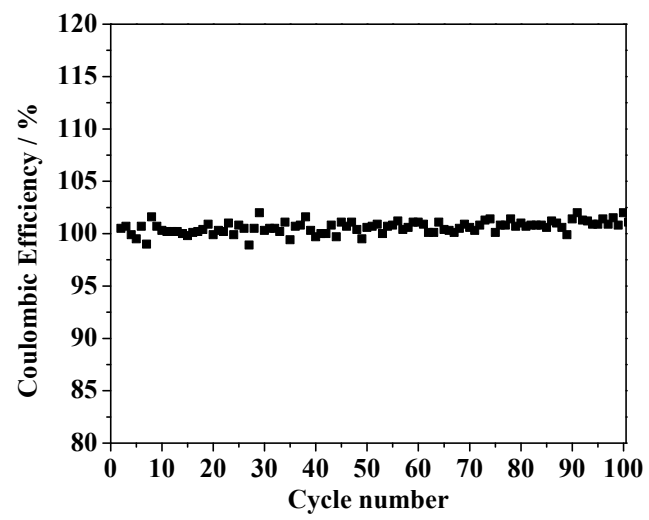

Supplement: c3ta14722c1.pdf [file c3ta14722c1.pdf]
